# Supplementary material
Source: Springer Nature journal article supplement (https://www.springermedizin.de/resource/supplementary/12890_2006_77_MOESM1_ESM.pdf/9505968)

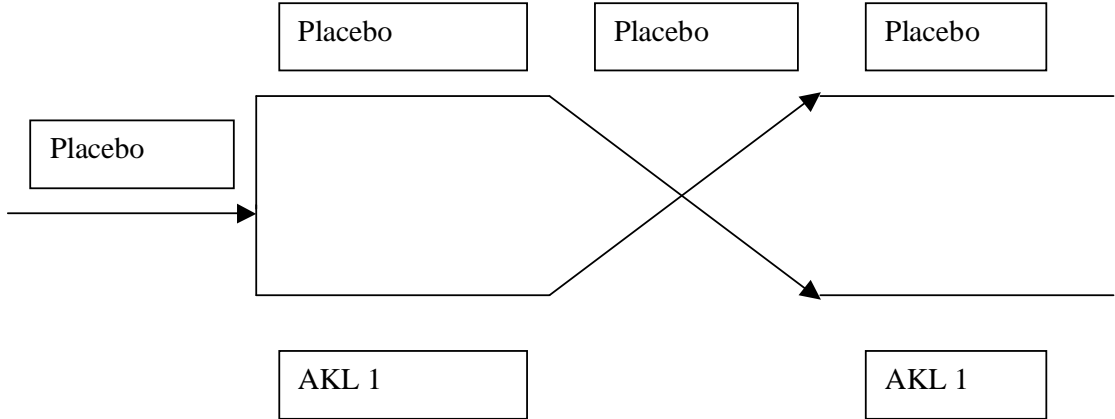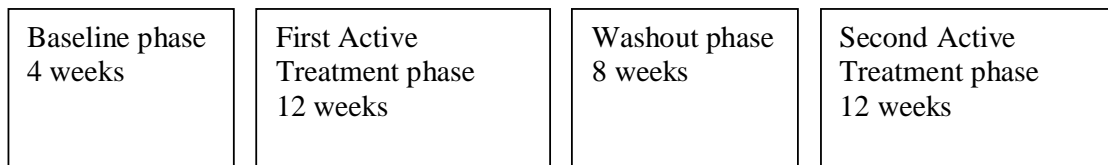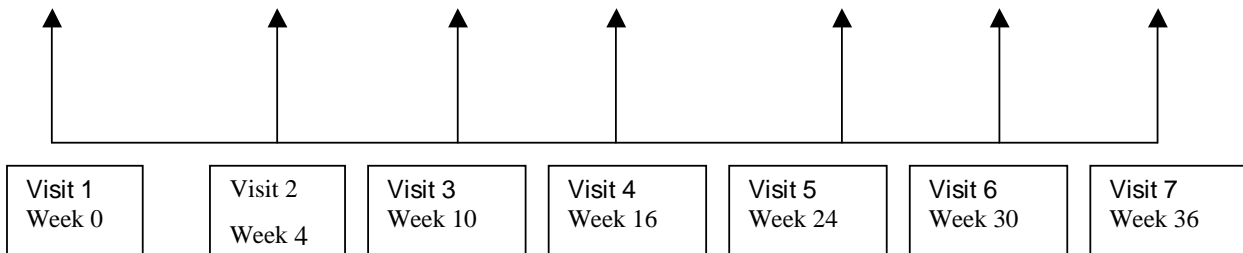

Supplement: MOESM1 [file 9505968]
